# Supplementary material for: Interplay between Graph Topology and Correlations of Third Order in Spiking Neuronal Networks
Source: PLOS journal article supplement (doi:10.1371/journal.pcbi.1004963), 2016-06-06
Supplement: S2 (10.1371/journal.pcbi.1004963.s002) [file journal.pcbi.1004963.s002]

## Computation of $\bar{\kappa}_3$

In this section, we derive the regular graph approximation for the average joint third cumulant. We start with the following formula.

$$\begin{aligned}\bar{\kappa}_3 = & \frac{\bar{\Lambda}}{N^3} \sum_{l_1, l_2, l_3} \left[ \sum_{i, j, k, m} G_{im}^{l_1} G_{jm}^{l_2} G_{km}^{l_3} \right] \\ & + \frac{3\bar{\Lambda}}{N^3} \sum_{l_1, l_2} \left[ \sum_{i, j, k} G_{ik}^{l_1} G_{jk}^{l_2} \right] \\ & + \frac{3\bar{\Lambda}}{N^3} \sum_{l_1, l_2, l_3} \left[ \sum_{i, j, k, m} G_{im}^{l_1} G_{jm}^{l_2} G_{mk}^{l_3} \right] \\ & + \frac{6\bar{\Lambda}}{N^3} \sum_{l_1, l_2, l_3} \left[ \sum_{i, j, k, n} G_{ij}^{l_1} G_{jn}^{l_2} G_{kn}^{l_3} \right] \\ & + \frac{6\bar{\Lambda}}{N^3} \sum_{l_1, l_2} \left[ \sum_{i, j, k} G_{ij}^{l_1} G_{jk}^{l_2} \right] \\ & + \frac{3\bar{\Lambda}}{N^3} \sum_{l_1, l_2, l_3, l_4} \left[ \sum_{i, j, k, m, n} G_{im}^{l_1} G_{jm}^{l_2} G_{mn}^{l_4} G_{kn}^{l_3} \right].\end{aligned}$$

These 6 terms each correspond to one of the 6 possible rooted trees, depicted in Fig. 4. First, let us compute the terms inside the square brackets. The following result holds :

*Let  $\mathcal{T}$  be an arbitrary rooted tree with at most  $N$  nodes. Then, the "square bracket" corresponding to it (obtained by summing over all possible indices of nodes in a tree with a fixed number of branches) can be computed using the following pseudo-algorithm :*

1. Set  $X = 1$ .
2. For every leaf of  $\mathcal{T}$ ,  $X \leftarrow X * N$
3. For every edge in  $\mathcal{T}$ ,  $X \leftarrow X * p$
4. For every internal node of out-degree  $k$  (where the root counts as an internal node) of  $\mathcal{T}$ ,  $X \leftarrow X * \frac{\mu^{(k)} \cdot N}{p}$ , where  $\mu^{(k)}$  is defined as the average common input, shared by  $k$  nodes, and is defined by

$$\mu^{(k)} = p \sum_t \frac{N_t}{N} g_t^k. \quad (1)$$

It is not difficult to prove that this is equivalent to :

Let  $\mathcal{T}$  be an arbitrary rooted tree with  $n \leq N$  nodes and  $l \leq n - 1$  leaves. Then, the corresponding "square bracket term" is equal to

$$N^n p^{l-1} \prod_v \mu^{(k_v)} \left[ \mu^{(1)} N \right]^{l_1 + \dots + l_{n-1} - n + 1}, \quad (2)$$

where the product is over all internal nodes (i.e. nodes that are not leaves) of  $\mathcal{T}$  and  $k_v$  is the out-degree of node  $v$ . The numbers  $l_1, \dots, l_{n-1}$  encode the lengths of branches of  $\mathcal{T}$ , of which there are  $n - 1$  (in a tree with  $n$  nodes).

We now use the previous result to compute "square bracket terms" for all the trees in Fig. 4. We have

1.  $T_1$  :

$$X_1 = N^4 p^2 \mu^{(3)} \left[ \mu^{(1)} N \right]^{l_1 + l_2 + l_3 - 3},$$

where  $l_1, l_2$  and  $l_3$  are fixed lengths of the three branches of the first tree and  $l_1, l_2, l_3 \geq 1$ .

2.  $T_2$  :

$$X_2 = N^3 p \mu^{(2)} \left[ \mu^{(1)} N \right]^{l_1 + l_2 - 2}.$$

3.  $T_3, T_4$  - they have the same number of nodes and their internal nodes have the same distribution of out-degrees :

$$X_3, X_4 = N^4 p \mu^{(1)} \mu^{(2)} \left[ \mu^{(1)} N \right]^{l_1 + l_2 + l_3 - 3}.$$

4.  $T_5$  :

$$X_5 = N^3 \left[ \mu^{(1)} \right]^2 \left[ \mu^{(1)} N \right]^{l_1 + l_2 - 2}.$$

5.  $T_6$  :

$$X_6 = N^5 p^2 \left[ \mu^{(2)} \right]^2 \left[ \mu^{(1)} N \right]^{l_1 + l_2 + l_3 + l_4 - 4}.$$

Now, we are finally ready to compute the sums of the "bracket terms" over the lengths of branches  $\{l_i\}_{1 \leq i \leq k}$ . Looking at the expressions for  $\{X_k\}_{1 \leq k \leq 6}$ , it is easy to see that the only place where the lengths  $l_i$  explicitly appear is as powers of the term  $\mu^{(1)} N$ . Thus, to compute sums over lengths of branches, we have to be able to compute

$$S_k \equiv \sum_{l_1, l_2, \dots, l_k} a^{\sum_{i=1}^k (l_i - 1)}. \quad (3)$$

First, we make the following observation.

The sum  $S_k$  can be written as

$$S_k = \sum_{r \geq k} \binom{r-1}{k-1} a^{r-k} = \sum_{r \geq k} \frac{1}{(k-1)!} (r-1)(r-2) \dots (r-k+1) a^{r-k} \quad (4)$$

To see why this is true, consider that, by definition,  $S_k = \sum_{l_1} \sum_{l_2} \cdots \sum_{l_k} a^{\sum_{i=1}^k (l_i - 1)}$ . If we introduce a new variable  $r = \sum_{i=1}^k l_i$ , we have that  $r \geq k$ , as  $l_i \geq 1$ , for all  $i$ . Furthermore, the number of different  $k$ -tuples  $(l_1, \dots, l_k)$  that result in the same value of  $r$  is equal to the number of compositions of the number  $r$  into  $k$  parts, which is equal to  $\binom{r-1}{k-1}$ . The claim then readily follows.

In addition, we also have the following :

The sum  $S_k$  is explicitly summable for all  $|a| < 1$  and equals

$$S_k = \frac{(-1)^{k-2}}{(1-a)^k}. \quad (5)$$

To prove this fact, we start from the result of the previous proposition and substitute  $r-1 = x$ , getting

$$S_k = \sum_{x \geq k-1} \frac{1}{(k-1)!} x(x-1) \cdots (x-k+2) a^{x-(k-1)}. \quad (6)$$

Now, letting  $n = k-1$  and  $r = x$  we obtained

$$S_{n+1} = \frac{1}{n!} \sum_{r \geq n} r(r-1) \cdots (r-n+1) a^{r-n}. \quad (7)$$

On the other hand, for  $|a| < 1$ ,

$$\begin{aligned} \frac{d}{da^n} \left( \frac{1}{1-a} \right) &= \frac{d}{da^n} \sum_{r \geq 0} a^r = \sum_{r \geq 0} r(r-1) \cdots (r-n+1) a^{r-n} \\ &= \sum_{r \geq n} r(r-1) \cdots (r-n+1) a^{r-n}, \end{aligned}$$

and therefore

$$S_{n+1} = \frac{1}{n!} \frac{d}{da^n} \left( \frac{1}{1-a} \right). \quad (8)$$

But, by induction,

$$\frac{d}{da^n} \left( \frac{1}{1-a} \right) = \frac{(-1)^{n-1} n!}{(1-a)^{n+1}}. \quad (9)$$

Thus, we have, after letting  $n+1 = k$ ,

$$S_k = \frac{(-1)^{k-2}}{(1-a)^k}, \quad (10)$$

which proves our claim.

We are now almost done. Indeed, from our previous considerations, we have

1.  $T_1$  ( $k=3$ ,  $S_3 = \frac{-1}{(1-a)^3}$ ):

$$\sum_{l_1, l_2, l_3} N^4 p^2 \mu^{(3)} \left[ \mu^{(1)} N \right]^{l_1 + l_2 + l_3 - 3} = \frac{-N^4 p^2 \mu^{(3)}}{(1 - \mu^{(1)} N)^3} \quad (11)$$

2.  $T_2$  ( $k = 2$ ,  $S_2 = \frac{1}{(1-a)^2}$ ) :

$$\sum_{l_1, l_2} N^3 p \mu^{(2)} \left[ \mu^{(1)} N \right]^{l_1 + l_2 - 2} = \frac{N^3 p \mu^{(2)}}{(1 - \mu^{(1)} N)^2} \quad (12)$$

3.  $T_3, T_4$  ( $k = 3$ ) :

$$\sum_{l_1, l_2, l_3} N^4 p \mu^{(1)} \mu^{(2)} \left[ \mu^{(1)} N \right]^{l_1 + l_2 + l_3 - 3} = \frac{-N^4 p \mu^{(1)} \mu^{(2)}}{(1 - \mu^{(1)} N)^3} \quad (13)$$

4.  $T_5$  ( $k = 2$ ) :

$$\sum_{l_1, l_2} N^3 \left[ \mu^{(1)} \right]^2 \left[ \mu^{(1)} N \right]^{l_1 + l_2 - 2} = \frac{N^3 \left[ \mu^{(1)} \right]^2}{(1 - \mu^{(1)} N)^2} \quad (14)$$

5.  $T_6$  ( $k = 4$ ,  $S_4 = \frac{1}{(1-a)^4}$ ) :

$$\sum_{l_1, l_2, l_3, l_4} N^5 p^3 \left[ \mu^{(2)} \right]^2 \left[ \mu^{(1)} N \right]^{l_1 + l_2 + l_3 + l_4 - 4} = \frac{N^5 p^3 \left[ \mu^{(2)} \right]^2}{(1 - \mu^{(1)} N)^4} \quad (15)$$

Finally, we are ready to write the formula for  $\bar{\kappa}_3$ . It reads

$$\begin{aligned} \bar{\kappa}_3 = & \frac{\bar{\Lambda}}{N^3} \frac{-N^4 p^2 \mu^{(3)}}{(1 - \mu^{(1)} N)^3} + \frac{3\bar{\Lambda}}{N^3} \frac{N^3 p \mu^{(2)}}{(1 - \mu^{(1)} N)^2} + \frac{3\bar{\Lambda}}{N^3} \frac{-N^4 p \mu^{(1)} \mu^{(2)}}{(1 - \mu^{(1)} N)^3} \\ & + \frac{6\bar{\Lambda}}{N^3} \frac{-N^4 p \mu^{(1)} \mu^{(2)}}{(1 - \mu^{(1)} N)^3} + \frac{6\bar{\Lambda}}{N^3} \frac{N^3 \left[ \mu^{(1)} \right]^2}{(1 - \mu^{(1)} N)^2} + \frac{3\bar{\Lambda}}{N^3} \frac{N^5 p^3 \left[ \mu^{(2)} \right]^2}{(1 - \mu^{(1)} N)^4}. \end{aligned}$$
